# Supplementary material for: Multiple-phase evolution and electrical transport of Sr4−xYxCo4O12−δ (x = 0–1.0): an ordered phase transition process
Source: Royal Society of Chemistry journal article supplement (doi:10.1039/d3dt00294b), 2023-01-01
Supplement: d3dt00294b1.pdf [file d3dt00294b1.pdf]

## Supporting information

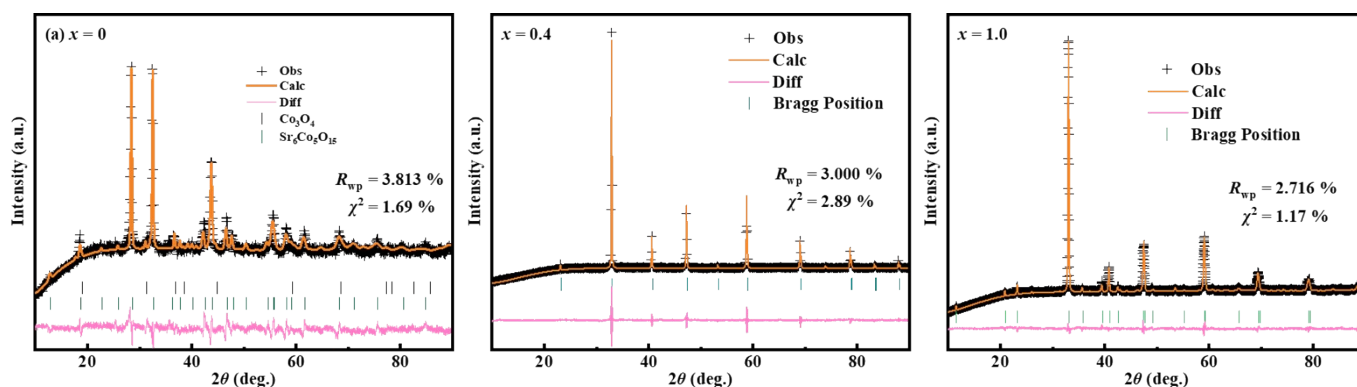

Figure 1. Rietveld refinement analysis of XRD patterns. (a)  $x=0$ , (b)  $x=0.4$ , (c)  $x=1.0$

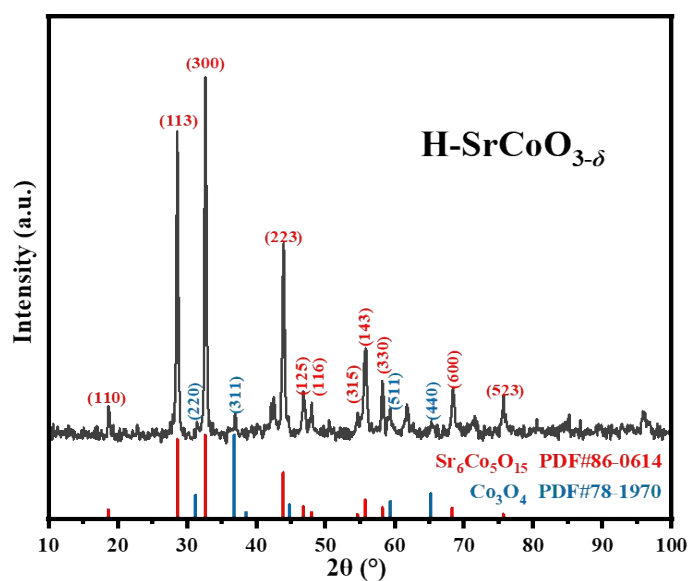

Figure 2. XRD patterns of  $H-SrCoO_{3-\delta}$ . Red:  $Sr_6Co_5O_{15}$ , blue:  $Co_3O_4$

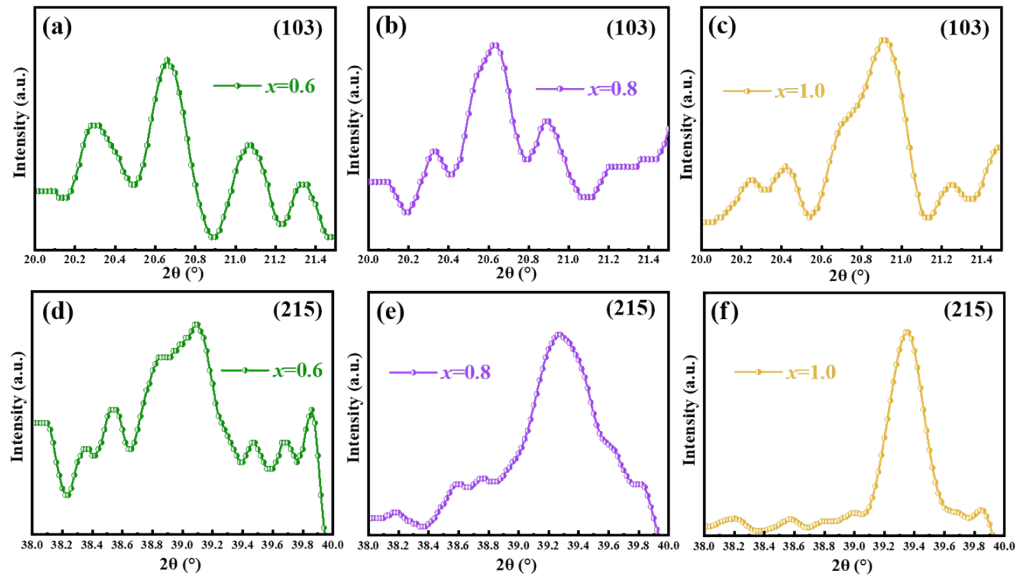

Figure 3. Slow scan XRD patterns of  $\text{Sr}_{4-x}\text{Y}_x\text{Co}_4\text{O}_{12-\delta}$  ( $x=0.6\sim 1.0$ ) polycrystals (103) and (215).

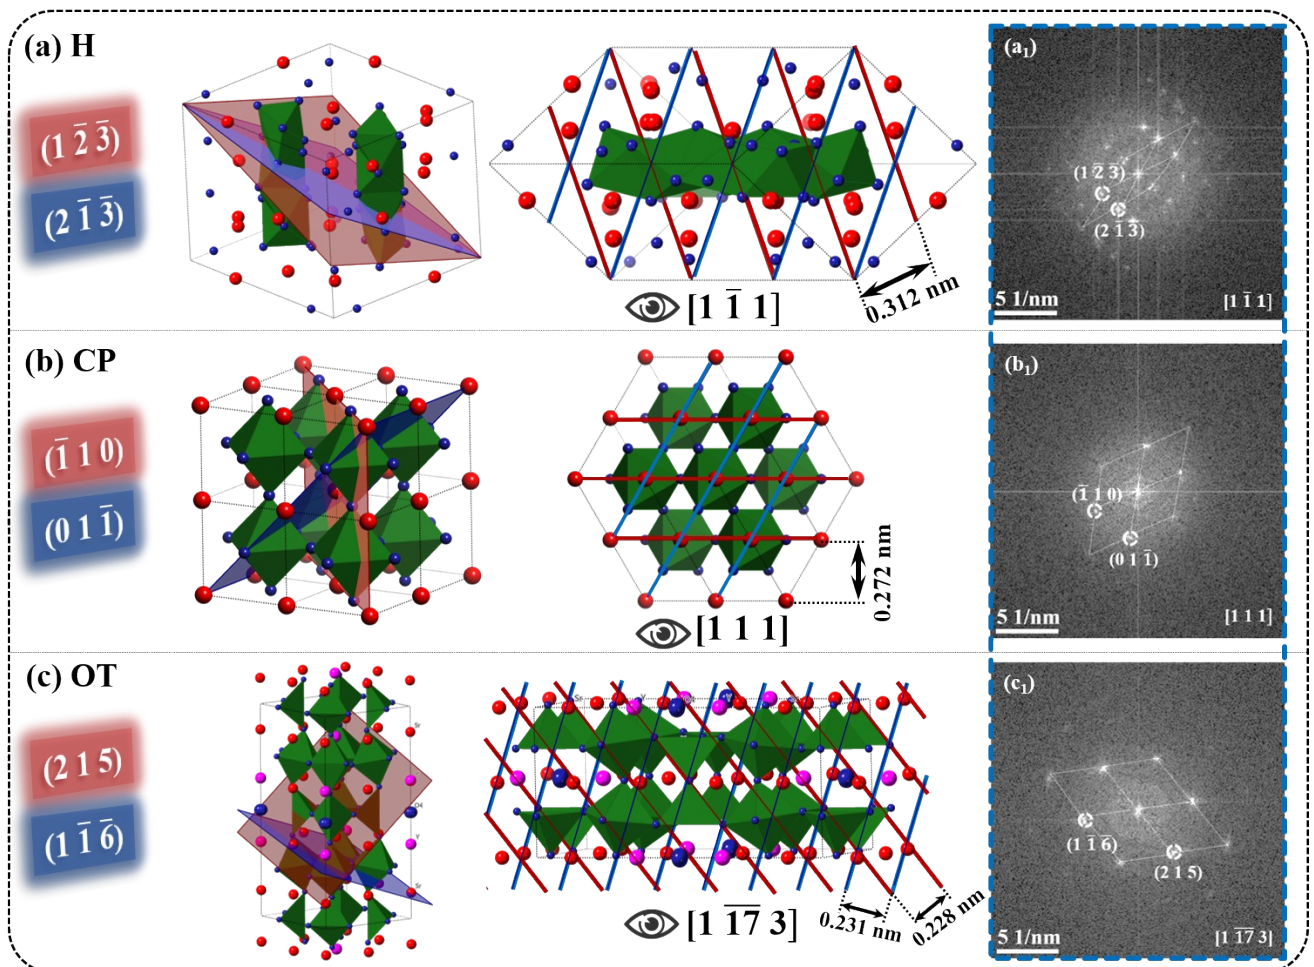

Figure 4. Position relations of TEM diffraction crystal planes in the crystal structure of  $\text{Sr}_{4-x}\text{Y}_x\text{Co}_4\text{O}_{12-\delta}$  ( $x=0, 0.4, 1.0$ ) ceramics. (a)  $x=0$ , (b)  $x=0.4$ , (c)  $x=1.0$ .

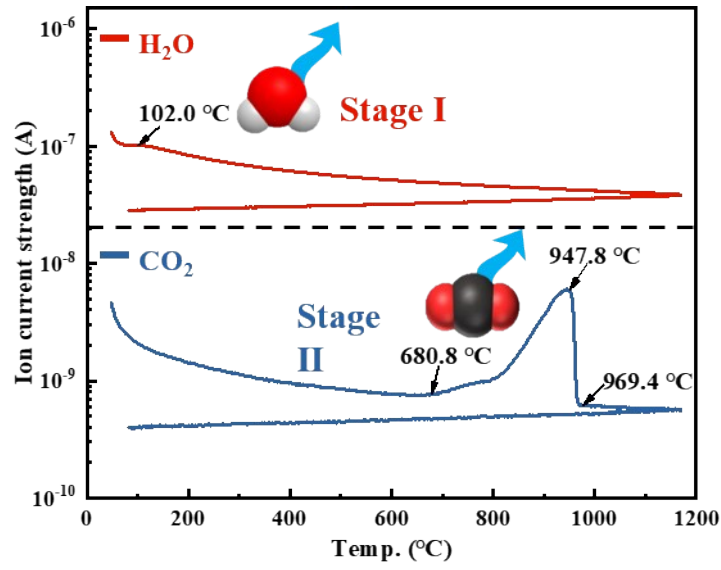

Figure 5. MS diagram of the sample  $\text{SrCoO}_{3-\delta}$  ( $x=0$ ) during the heating process.

Table. 1. Iodine titration results for  $\text{Sr}_3\text{YCo}_4\text{O}_{10.5+\delta}$ . A: 1000 °C, B: 1180 °C.  $\bar{a}$ : Oxygen content

| Process numbers | Sintering processes | Titre value 1 | Titre value 2 | Titre value 3 | $\bar{a}$ |
|-----------------|---------------------|---------------|---------------|---------------|-----------|
| A               | 1000°C/24 h         | 10.504        | 10.500        | 10.494        | 10.499    |
| B               | 1180°C/24 h         | 10.560        | 10.557        | 10.554        | 10.557    |

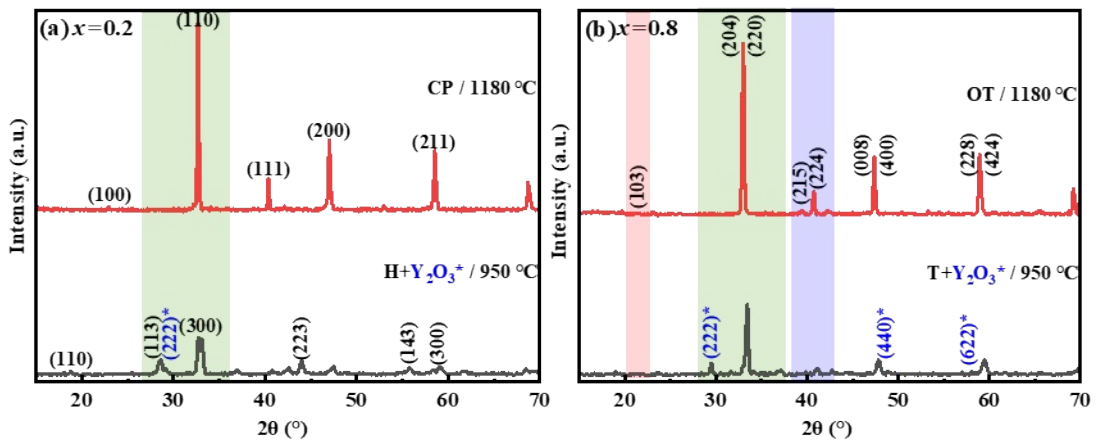

Figure 6. XRD patterns of  $\text{Sr}_{4-x}\text{Y}_x\text{Co}_4\text{O}_{12-\delta}$  ( $x=0.2, 0.8$ ) ceramics sintering at 950 °C and 1180 °C. (a)  $x=0.2$ , (b)  $x=0.8$ .
